# Supplementary material for: Repurposing the cellulase workhorse Trichoderma reesei as a ROBUST chassis for efficient terpene production
Source: Royal Society of Chemistry journal article supplement (doi:10.1039/d3gc01770b), 2023-01-01
Supplement: d3gc01770b1.pdf [file d3gc01770b1.pdf]

**Supplementary information for**

**Repurposing the cellulase workhorse *Trichoderma reesei* as a ROBUST chassis for efficient terpene production**

Meili Xiao<sup>1, 2</sup>, Yinmei Wang<sup>1, 2</sup>, Yan Wang<sup>1</sup>, Xing Yan<sup>1</sup>, Zhihua Zhu<sup>1</sup>, Ernuo Tian<sup>1, 2</sup>, Chengshuai Yang<sup>1</sup>, Erdong Ma<sup>1, 2</sup>, Gen Zou<sup>1, 3, \*</sup>, Zhihua Zhou<sup>1, 2, \*</sup>, Pingping Wang<sup>1, \*</sup>

<sup>1</sup> CAS-Key Laboratory of Synthetic Biology, CAS Center for Excellence in Molecular Plant Sciences, Chinese Academy of Sciences, Shanghai, 200032, China

<sup>2</sup> University of the Chinese Academy of Sciences, Beijing, 100049, China

<sup>3</sup> Shanghai Key Laboratory of Agricultural Genetics and Breeding, Institute of Edible Fungi, Shanghai Academy of Agriculture Science, Shanghai, 201403, China

These authors contributed equally: Meili Xiao, Yinmei Wang

Email address: [ppwang@cemps.ac.cn](mailto:ppwang@cemps.ac.cn), [zhouzhihua@cemps.ac.cn](mailto:zhouzhihua@cemps.ac.cn), [zougen@sibs.ac.cn](mailto:zougen@sibs.ac.cn)

## Supplementary methods

### General

Oligonucleotide primers synthesis and sequencing were performed by Biosune (shanghai, China). All the fragments for cloning were amplified by the PrimeSTAR HS DNA polymerase kit (TaKaRa, Japan). Cas9 protein tagged with a nuclear localization signal was purchased from Novoprotein, Inc. (Shanghai, China). Templates for guide RNA transcription were generated by oligo-extension using I5 polymerase (Tsingke, Beijing, China). Target sequences were designed in silico using Cas-Designer and Cas-OFFinder (<http://www.rgenome.net/cas-offinder/>) to reduce off-target. Guide RNAs were in vitro transcribed through runoff reactions using the T7 RNA polymerase (New England BioLabs) according to the manufacturer's protocol.

The GC analyses were performed with GC-2010 Pro (Shimadzu, Kyoto, Japan) equipped with a TG-5MS capillary column (30 m×0.25 mm×0.25 μm film thickness; Thermo Scientific) and a flame ionization detector (FID). The GC-MS analyses were conducted with an Agilent 7890B GC system coupled to an Agilent 5977B MSD fitted with an HP-5MS capillary column (30 m×0.25 mm×0.25 μm film thickness; Agilent). The program parameters of metabolites were the same as GC in GC-MS analysis. The HPLC analyses were performed with a Shimadzu LC20A system and a photo-diode detector (PDA) using a Boltimate Core-Shell C<sub>18</sub> Column (2.1 mm×100mm, 2.7 μm; Welch Material, Maryland, America). A gradient of elution (A, water; B, acetonitrile) was used with the following program: 0-2 min (45% B), 2-15 min (45%-100% B), 15-27 min (100% B), 27-30 min (45% B) and the flow rate was maintained at 0.45 mL min<sup>-1</sup>. The triterpenoid products were detected at 203 nm. The HPLC-MS analyses were carried out with an Agilent LC1290-MS/QTOF6545 system. The column and program were same to those in HPLC.

### Extraction, analyses, and purification of terpenoids

To analyze the 1,8-cineole (**2**) from transformant harboring *hyp3*, 10% (v/v) *n*-dodecane was added into the fermentation broth. After 4-days of growth, the dodecane layer diluted at 1:100 in ethyl acetate for GC and GC-MS analysis. The GC program was as follows: each sample was injected into the column at 60 °C and hold for 3 min; the column temperature ramped to 280 °C at a rate of 15 °C min<sup>-1</sup> and hold for 5 min. The temperature of inlet and FID detector were kept at 300 °C. The injection volume was 1 μL in split ratio of 10. The flow rate of nitrogen carrier gas was 1.0 mL min<sup>-1</sup>.

The extraction and analysis of aristolochene (**3**) are the same as 1,8-cineole (**2**). For the purification of **3**, 1 L of the culture was extracted with equal *n*-hexane overnight at room temperature. The extract was concentrated and then subjected to silica gel column chromatography, *n*-hexane as the elution solvent, to yield a colorless liquid.

The extraction and purification of fusicoccadiene (**4**) are the same as aristolochene (**3**), except for the dodecane layer diluted at 1:100 in *n*-hexane for GC and GC-MS analysis. The GC program was as follows: each sample was injected into the column at 60 °C and hold for 2 min; the column temperature ramped to 150 °C at a rate of 30 °C min<sup>-1</sup>, with increased at 10 °C min<sup>-1</sup> to 180°C, then increased to 280 °C at 30 °C min<sup>-1</sup> and hold for 5 min. The temperature of inlet and FID detector were kept at 300°C. The injection volume was 2 µL in split ratio of 10. The flow rate of nitrogen carrier gas was 1.0 mL min<sup>-1</sup>.

The extraction and analysis of stellata-2,6,19-triene (**5**) are the same as ophiobolin F (**1**). For the purification of **5**, 1 L of the culture was extracted with equal ethyl acetate. The extract was reextracted by *n*-hexane and concentrated. The residues were subjected to silica-gel column chromatography, with elution using *n*-hexane, to yield a white powder.

For the analysis of protosta-17(20)*Z*,24-dien-3β-ol (**6**) from transformant, 500 µL fermented broth after mycelium disruption was extracted with 1mL ethyl acetate twice. The extract concentrated under reduced pressure was resuspended by 100 µL ethyl acetate, and then subjected to HPLC and LC-MS analysis. For the purification of **6**, the extract from 2 L culture of transformant was subjected to silica gel column chromatography with stepwise elution of petroleum ether and ethyl acetate (50:1, 30:1, 20:1, 10:1, and 0:1, v/v) to yield 5 fractions. Fraction 3 was further purified by preparative thin layer chromatography (TLC) to obtain **6** as white powder.

The extraction of taxadiene (**7**) are the same as aristolochene (**3**), except for the dodecane layer was extract for direct injection into GC and GC-MS. The GC program was as follows: each sample was injected into the column at 150 °C and hold for 2min; the column temperature ramped to 180 °C at a rate of 10 °C min<sup>-1</sup> and hold for 10min, with increased at 3 °C min<sup>-1</sup> to 210 °C, then increased to 250 °C at 10°C min<sup>-1</sup> and hold

for 5min. The temperature of inlet and FID detector were kept at 270 °C. The injection volume was 2 µL in split ratio of 10. The flow rate of nitrogen carrier gas was 1.0 mL min<sup>-1</sup>.

## Supplementary figures

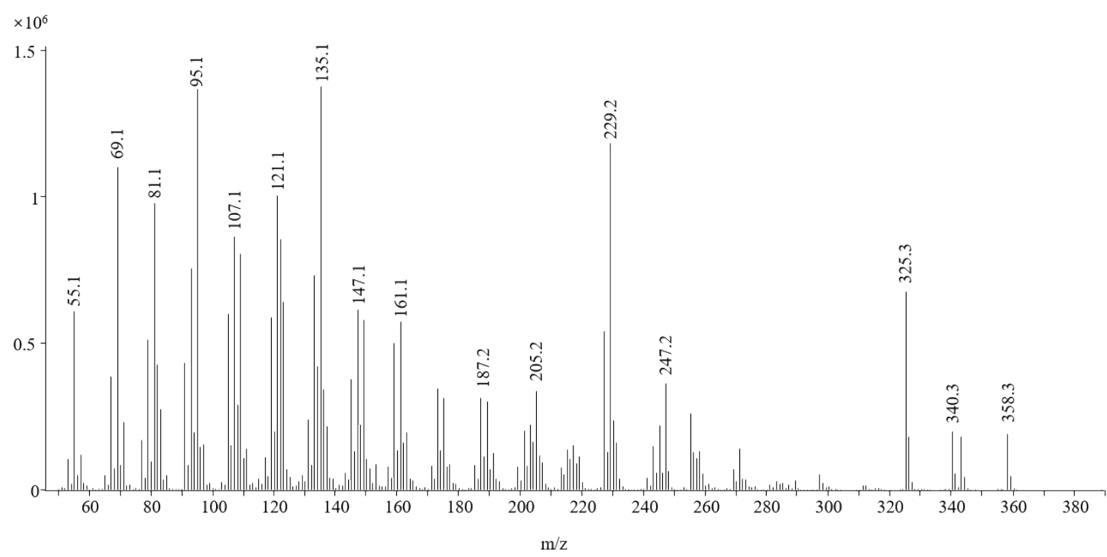

**Figure S1** MS spectrum of **1** from the transformant.



A

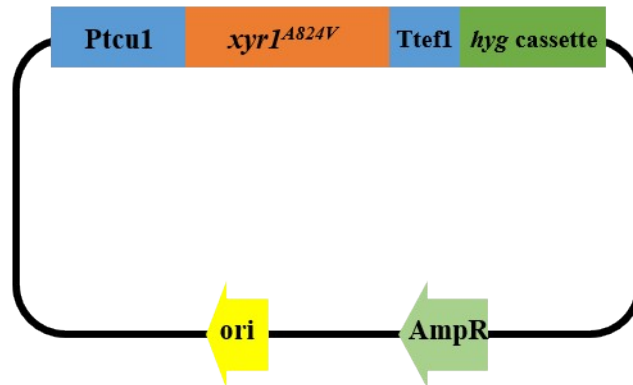

B

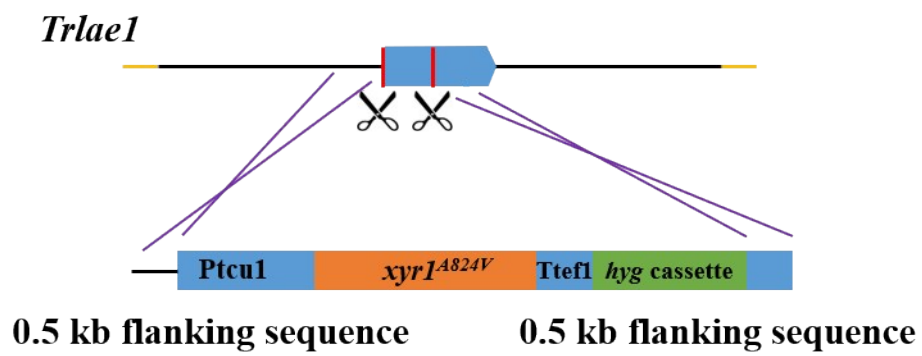

**Figure S3** The schematic diagram for a strain overexpressing the cellulase production regulator *xyr1<sup>A824V</sup>* (A, OE*xyr1*/MC3- $\Delta$ 10-TrAcOS) and simultaneously deleting the secondary metabolism regulator *lae1* (B,  $\Delta$ *lae1*:: *xyr1*/MC3- $\Delta$ 10-TrAcOS) construction in *T.reesei*.

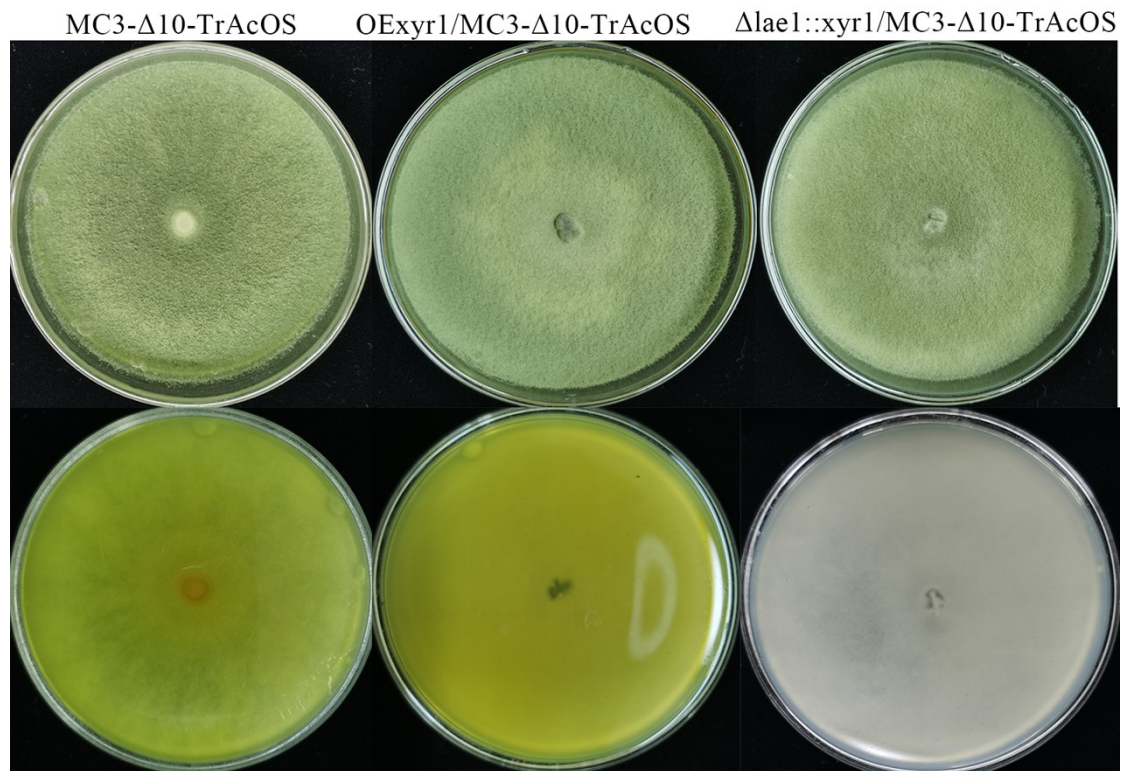

**Figure S4** Phenotype of *T. reesei* MC3- $\Delta$ 10-TrAcOS, OExyr1/MC3- $\Delta$ 10-TrAcOS and  $\Delta$ lae1::xyr1/MC3- $\Delta$ 10-TrAcOS strains on PDA medium.



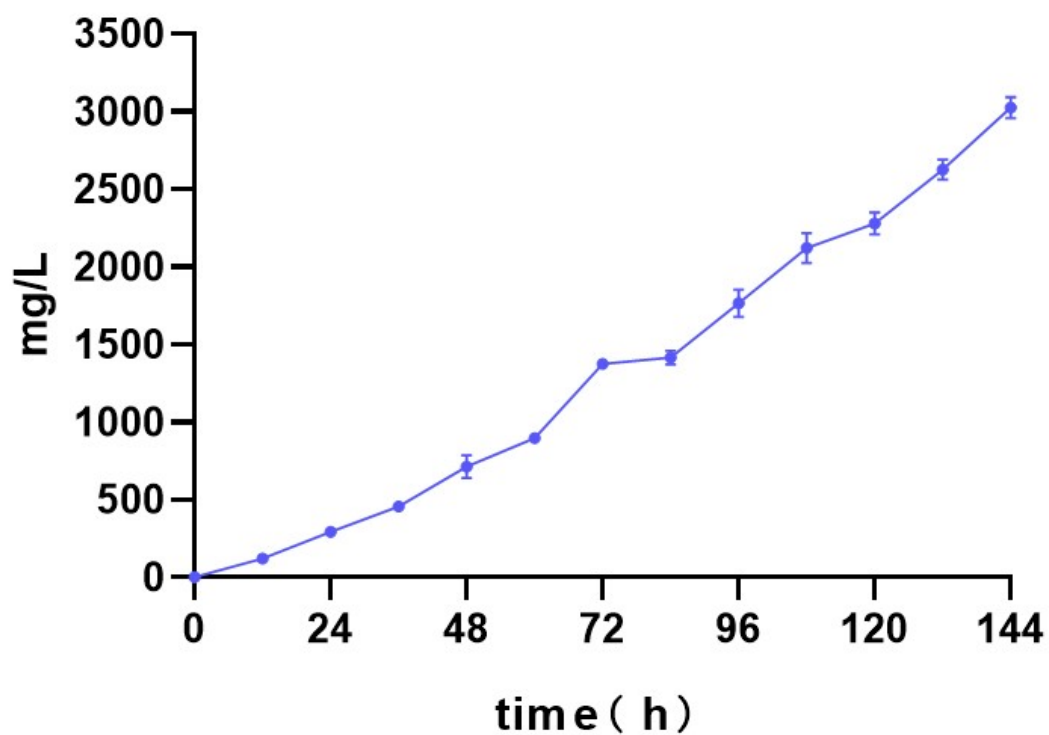

**Figure S5** The time-course of ophiobolin F (1) production in the fermenter. The strain  $\Delta lae1::xyr1/ MC3-\Delta 10-TrAcOS$  provided with 1% lactose and 3% glucose as initial carbon source. After 48 h, 0.56 g/h sugar (lactose : glucose = 1:3) was supplemented in fed-batch system. With the accumulated production, the yield of ophiobolin F (1) reached 3.02 g/L on 144 h.

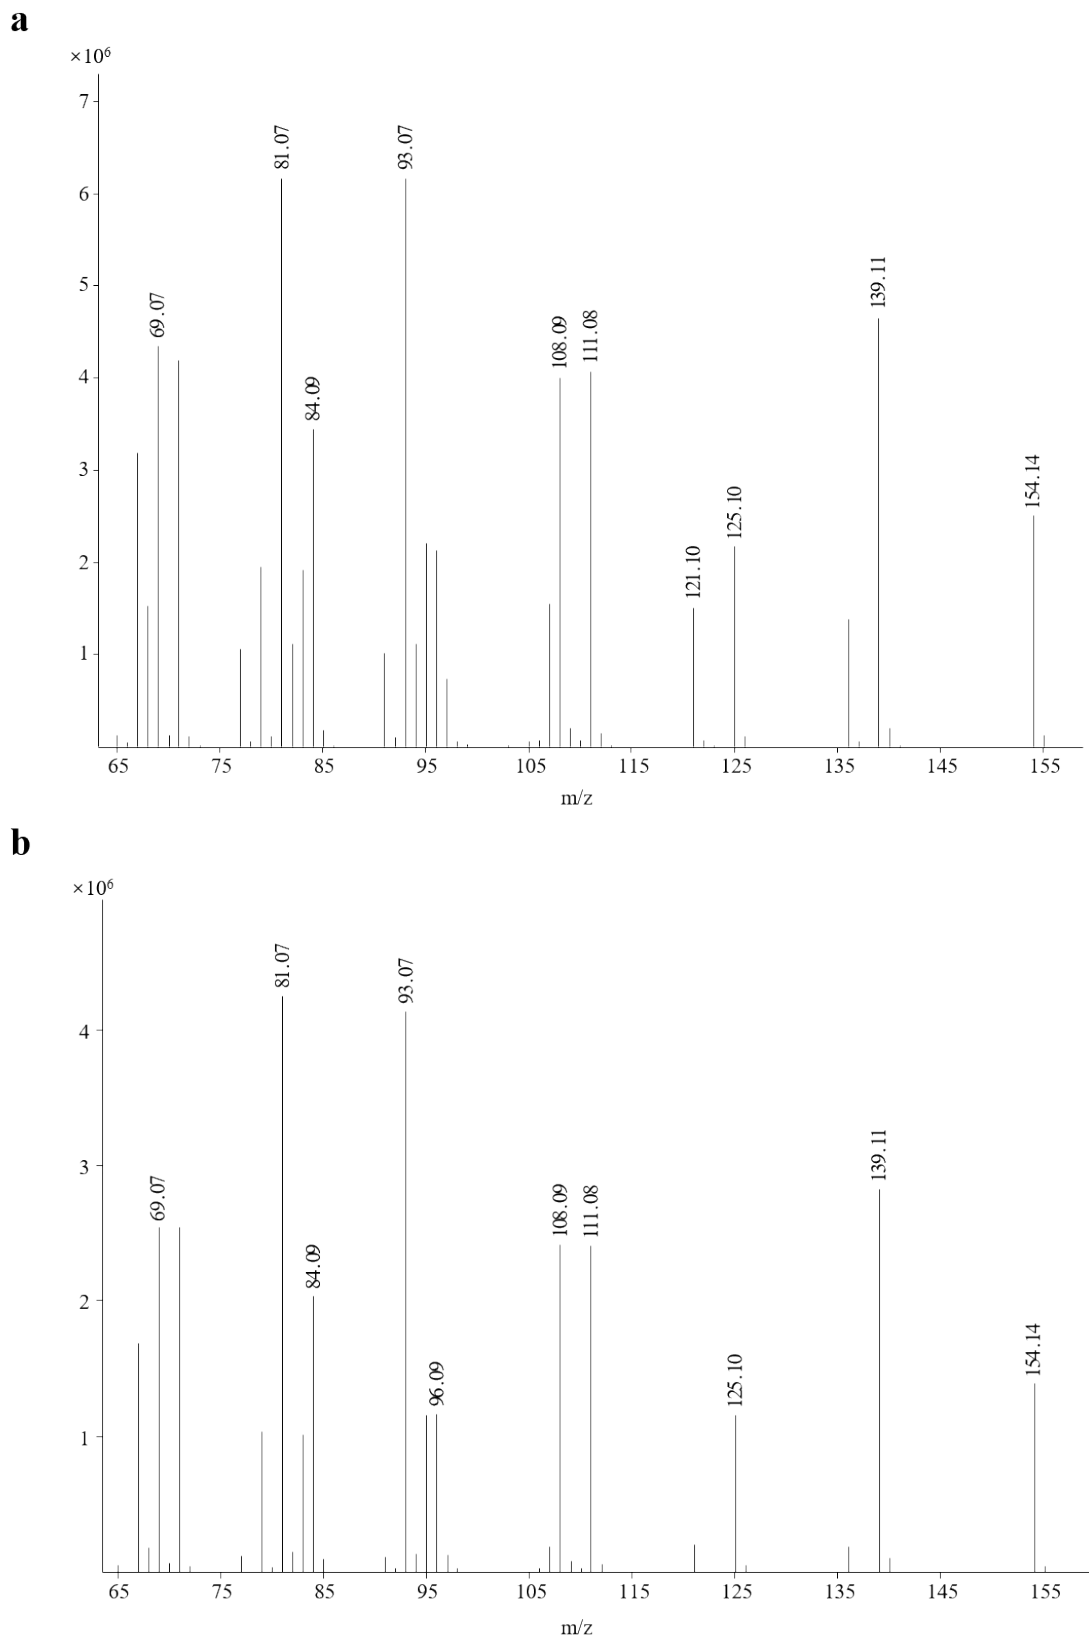

**Figure S6** GC-MS analysis of **2** and authentic sample. (a) MS spectrum of **2** from transformant; (b) MS spectrum of authentic **2**.

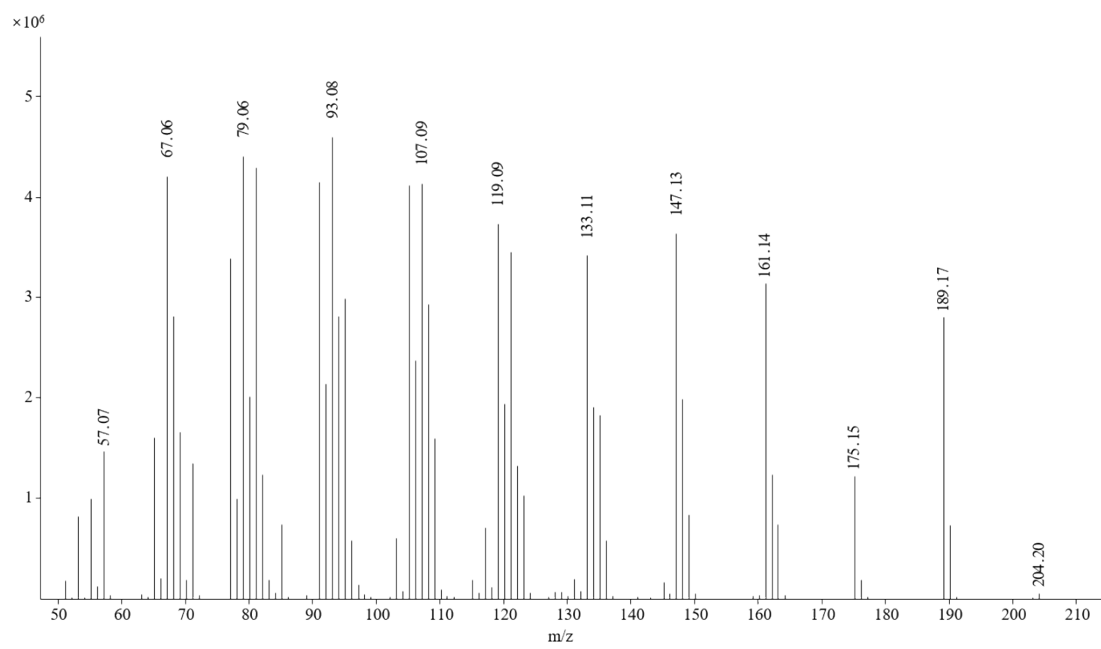

**Figure S7** MS spectra of **3**.

**a**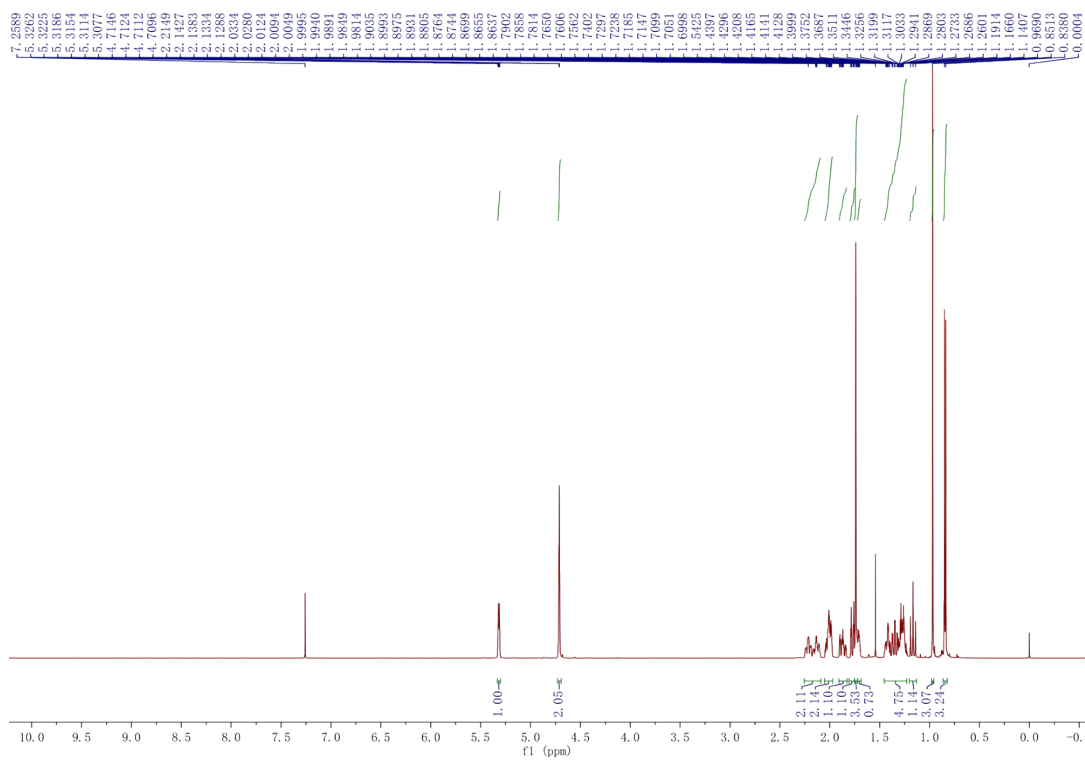**b**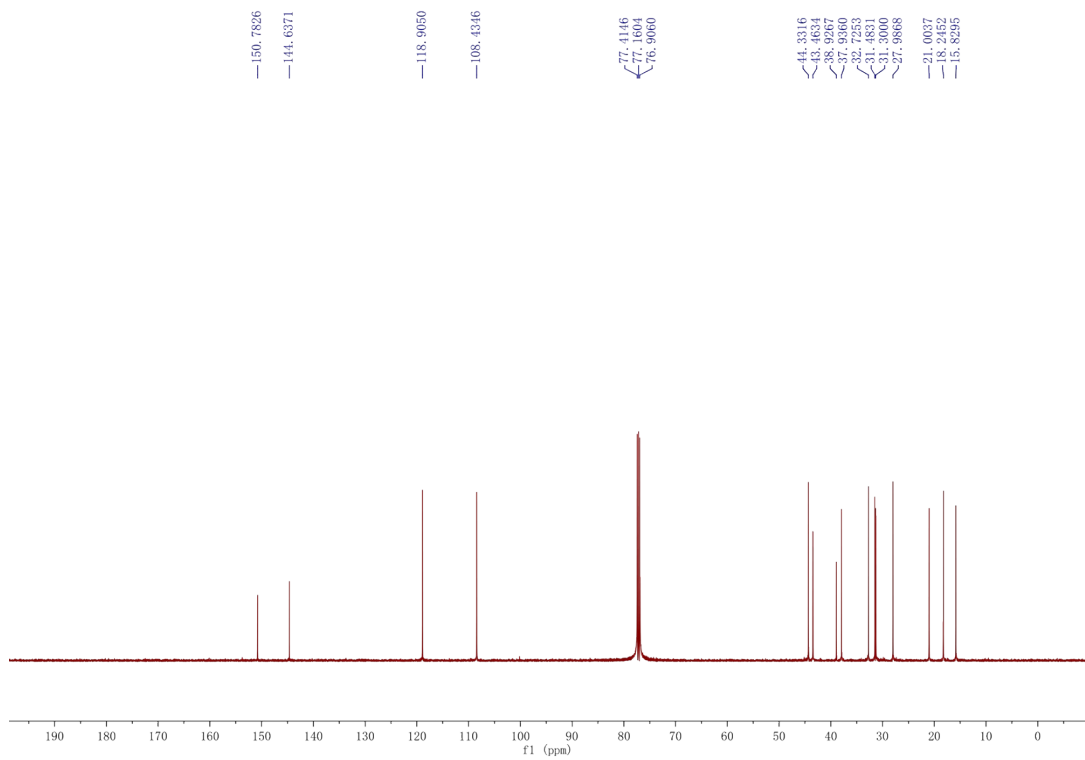

**Figure S8** NMR spectrum of **3**. (a)  $^1\text{H}$  NMR spectrum in  $\text{CDCl}_3$  at 500MHz; (b)  $^{13}\text{C}$  NMR spectrum in  $\text{CDCl}_3$  at 125MHz.

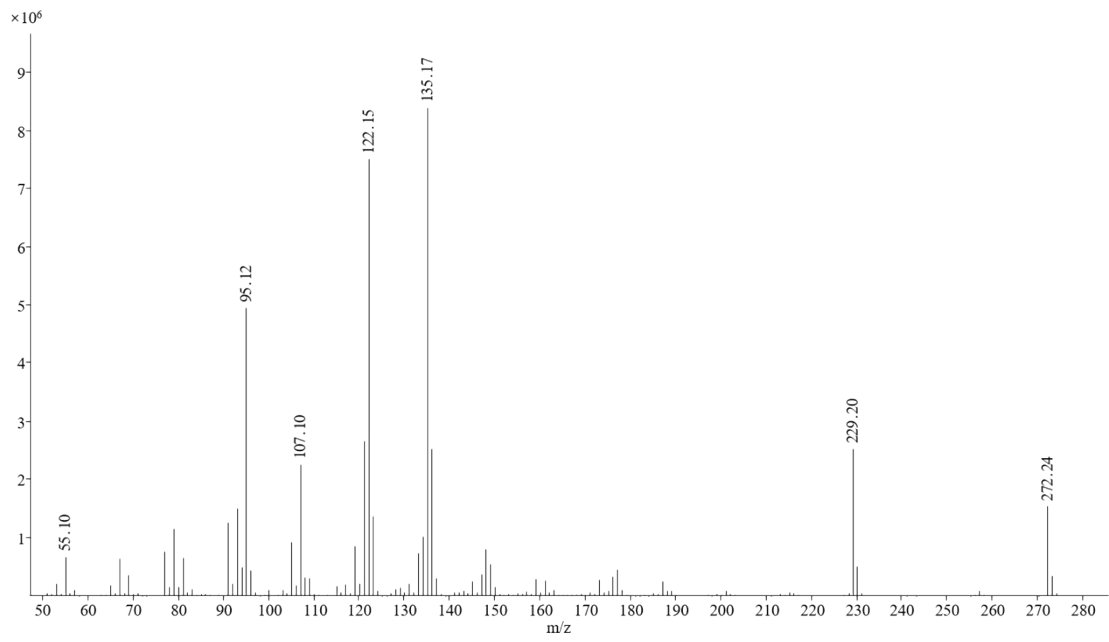

**Figure S9** MS spectra of **4**.

**a**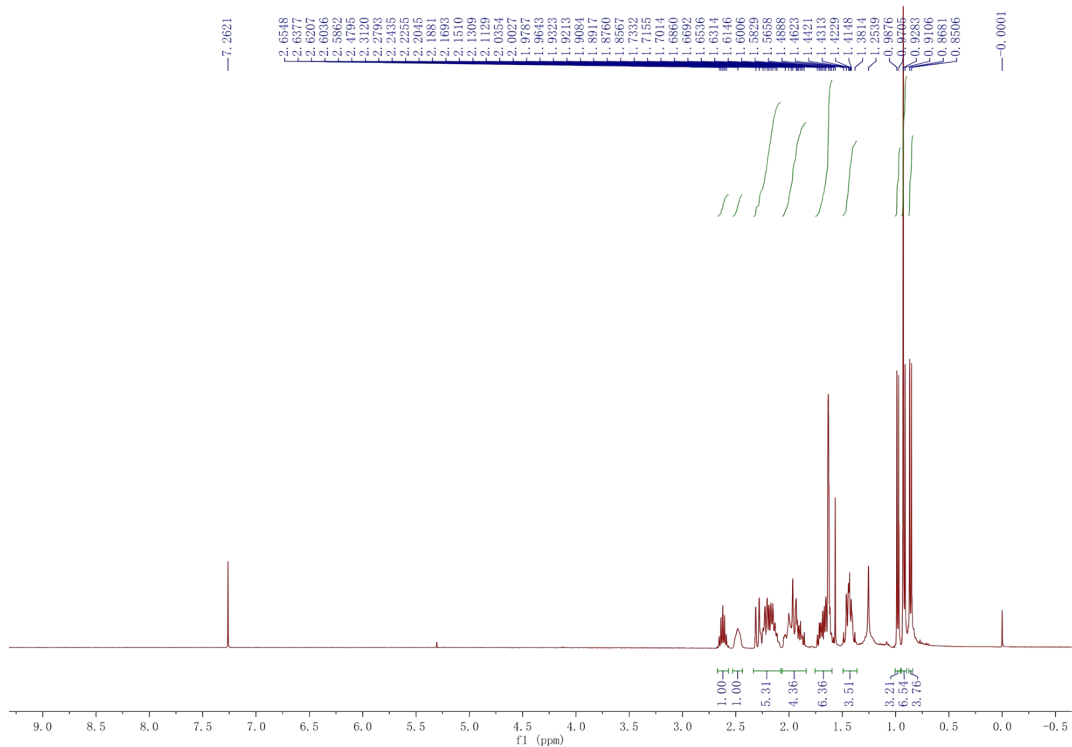**b**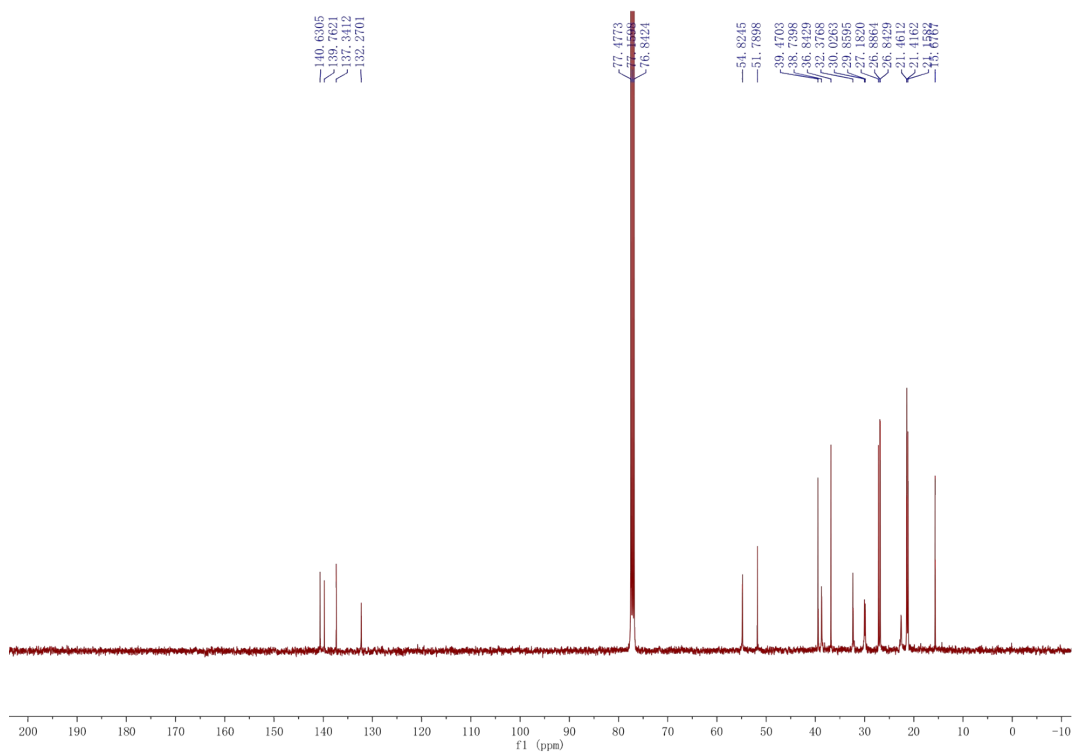

**Figure S10** NMR spectrum of **4**. (a)  $^1\text{H}$  NMR spectrum in  $\text{CDCl}_3$  at 500MHz; (b)  $^{13}\text{C}$  NMR spectrum in  $\text{CDCl}_3$  at 125MHz.

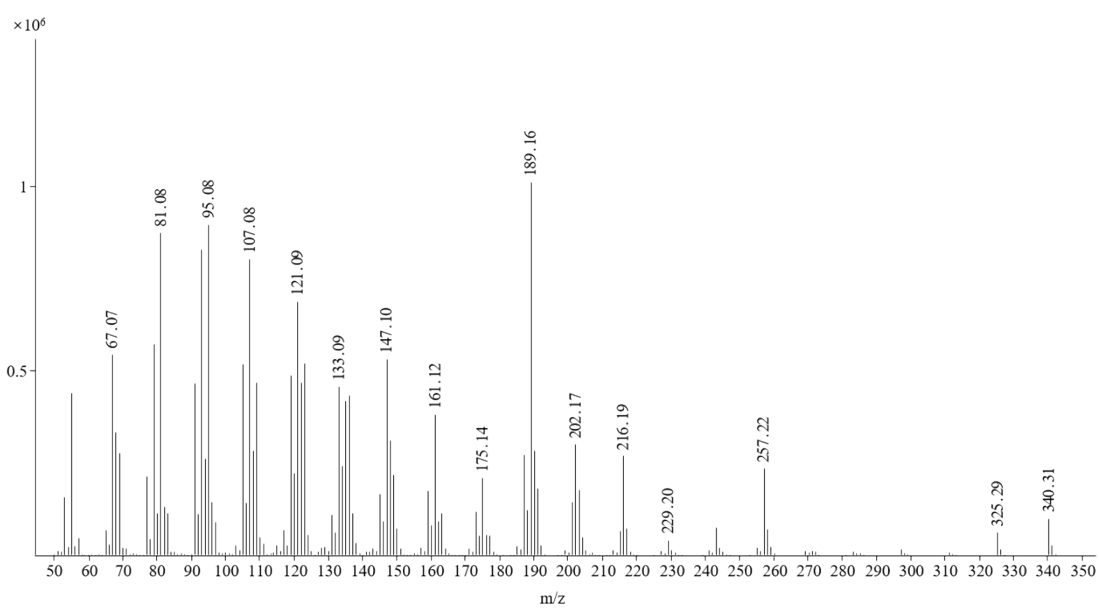

**Figure S11** MS spectra of **5**.

**a**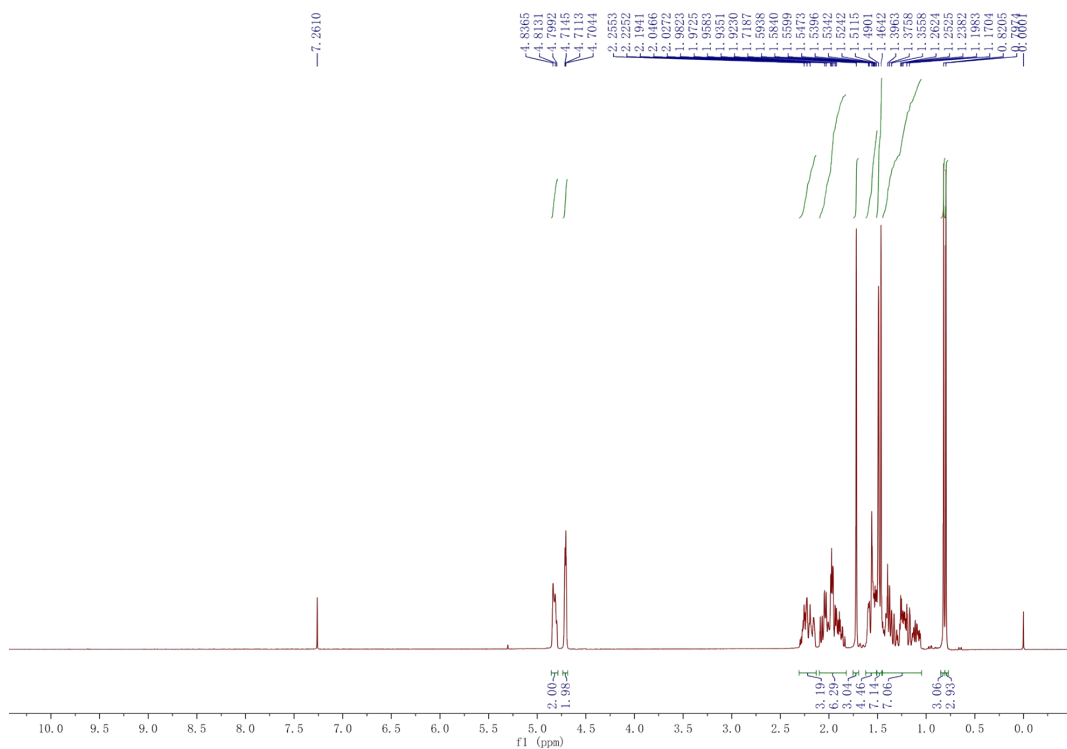**b**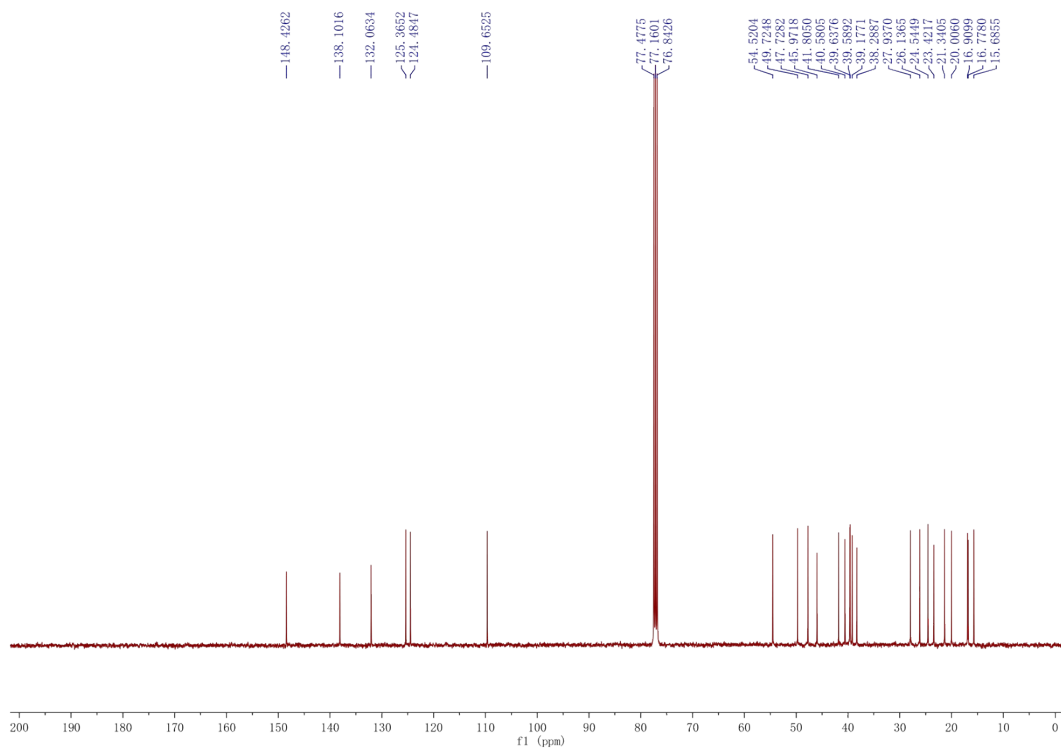

**Figure S12** NMR spectrum of **5**. (A) <sup>1</sup>H NMR spectrum in CDCl<sub>3</sub> at 400MHz; (B) <sup>13</sup>C NMR spectrum in CDCl<sub>3</sub> at 100MHz.



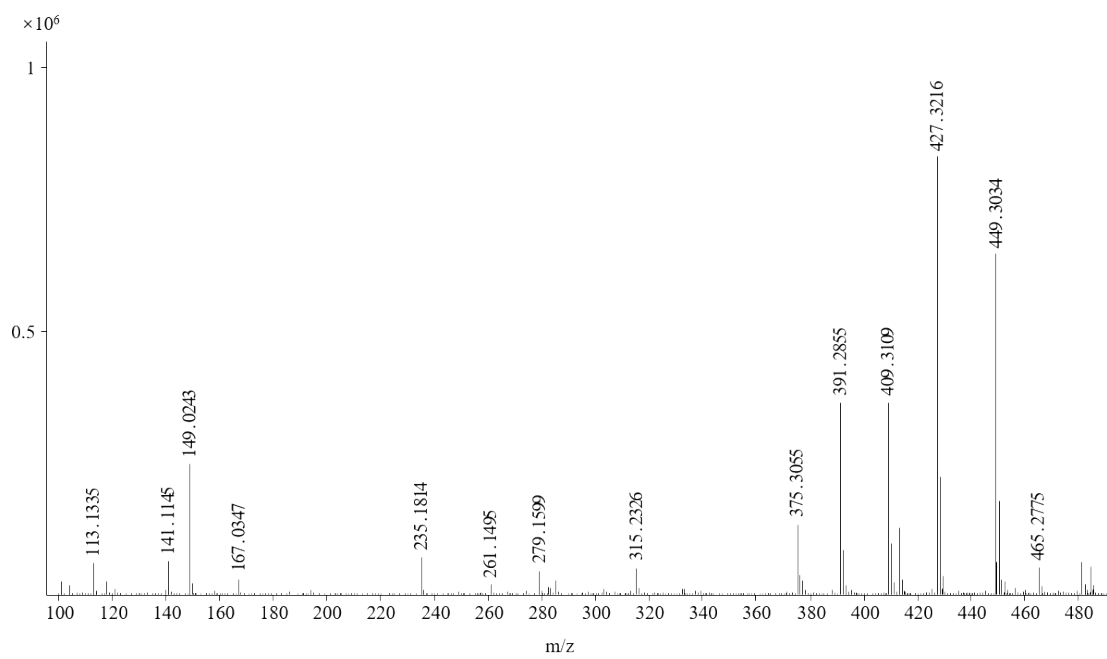

**Figure S13** MS spectra of **6**.

**a**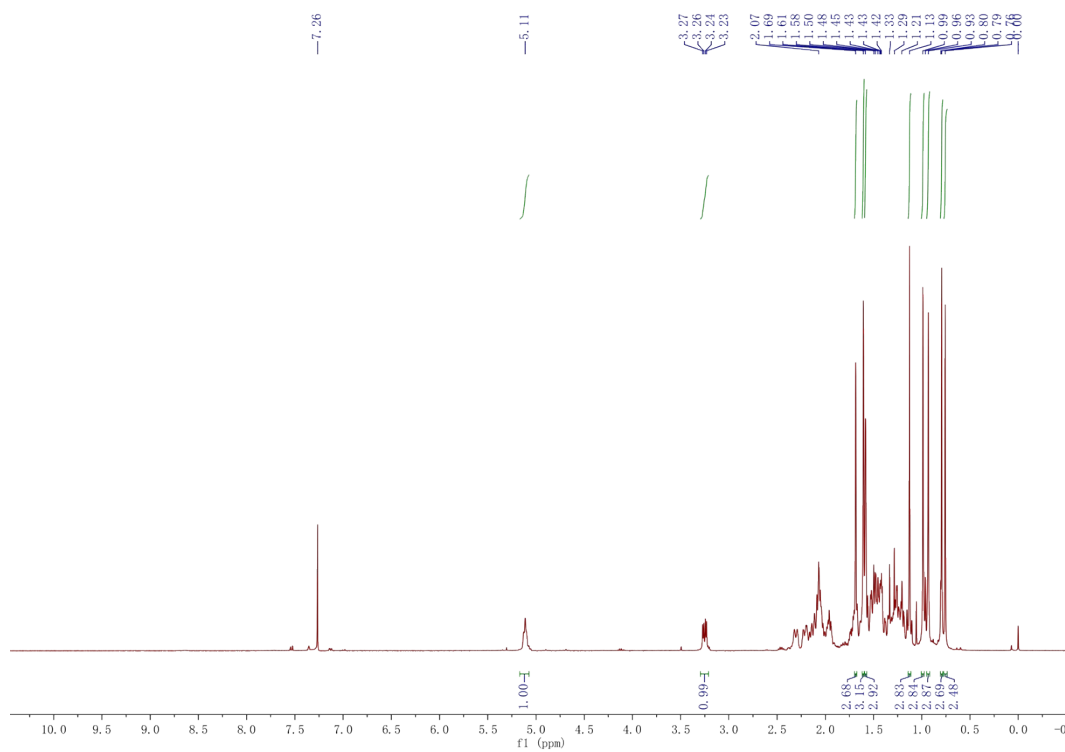**b**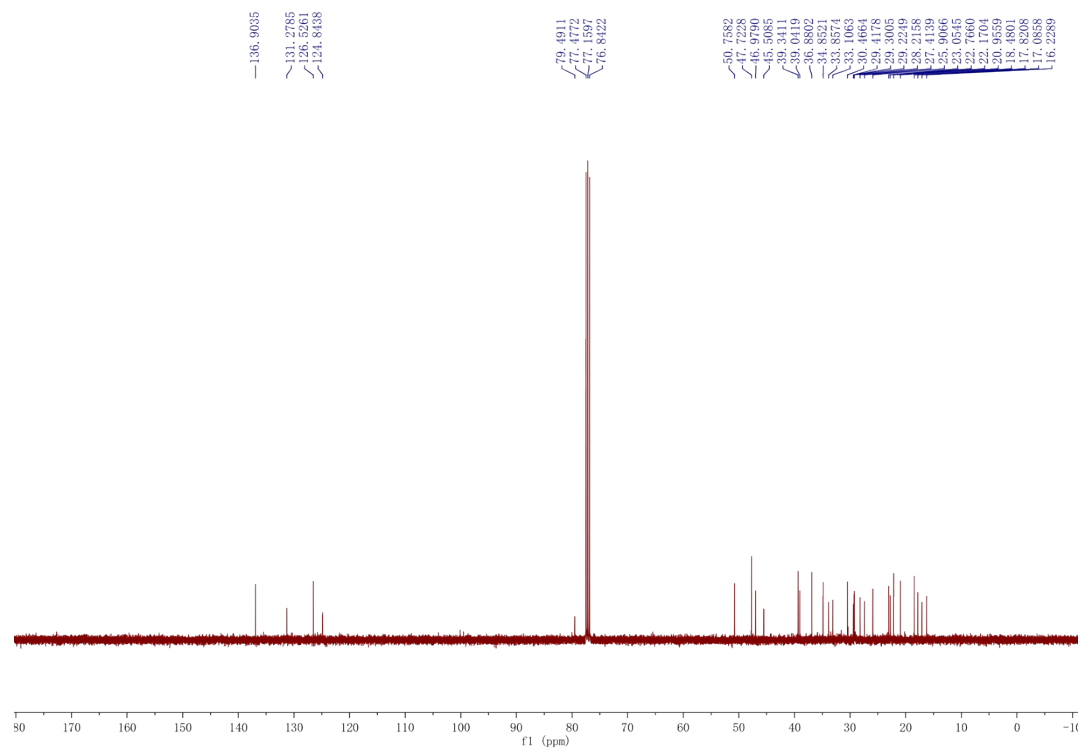

**Figure S14** NMR spectrum of **6**. (a)  $^1\text{H}$  NMR spectrum in  $\text{CDCl}_3$  at 500MHz; (b)  $^{13}\text{C}$  NMR spectrum in  $\text{CDCl}_3$  at 125MHz.

**a**

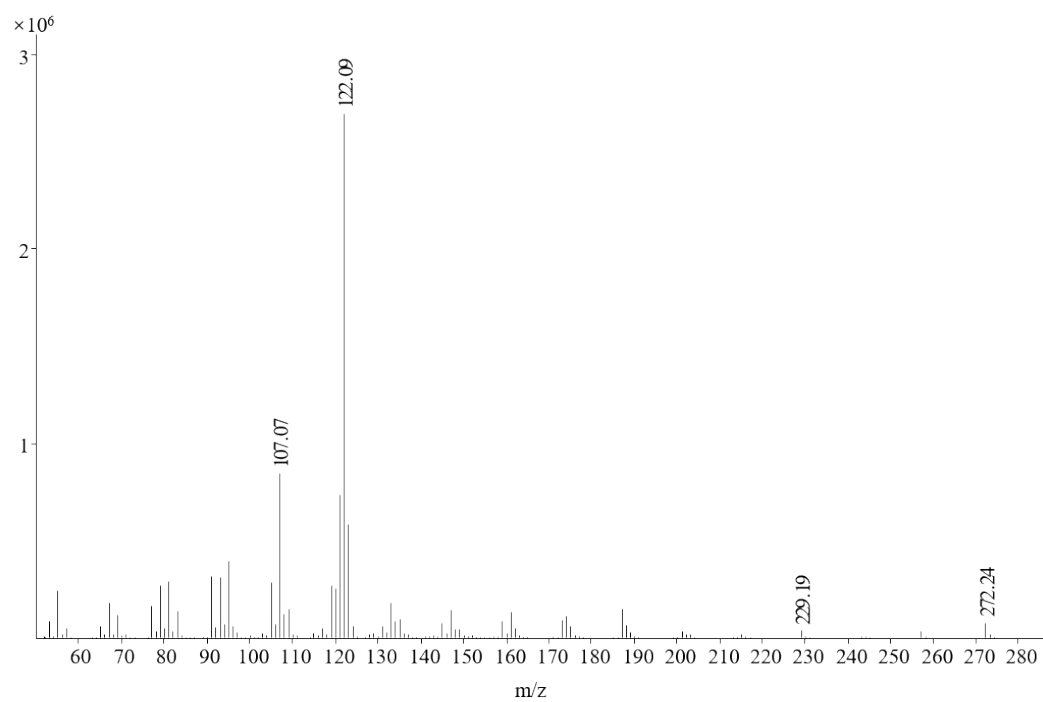

**b**

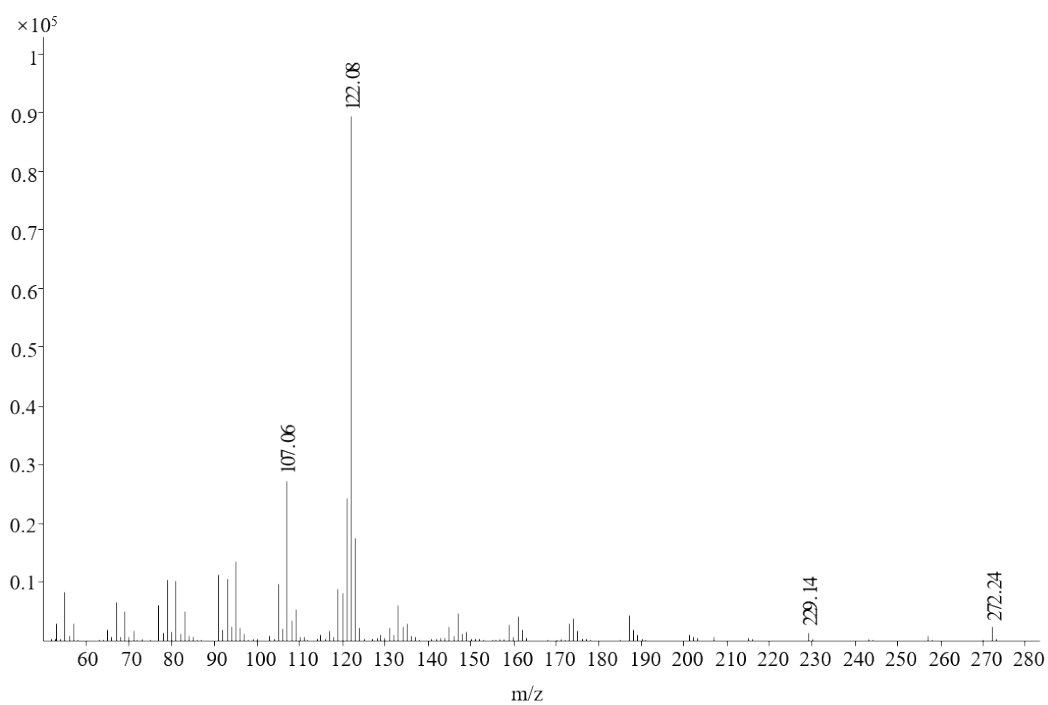

**Figure S15** GC-MS analysis of **7** produced by MC3- $\Delta$ 10-TAS and authentic sample. (a) MS spectrum of **7** from MC3- $\Delta$ 10-TAS; (b) MS spectrum of authentic **7**.

## Supplementary Tables

**Table S1** Putative functions of genes in the terpenoid backbone biosynthesis pathways in *T.reesei*

RutC30

| <b>Name</b> | <b>NCBI-Protein ID</b> | <b>Putative function</b>                 |
|-------------|------------------------|------------------------------------------|
| ACAT        | ETS00561               | acetyl-CoA acetyltransferase             |
| HMGS        | ETS04320               | hydroxymethylglutaryl-CoA synthase       |
| HMGR        | ETS06777               | hydroxymethylglutaryl-CoA reductase      |
| MK          | ETS02989               | mevalonate kinase                        |
| PMK         | ETS05511               | phosphomevalonate kinase                 |
| MDC         | ETR99754               | Mevalonate pyrophosphate decarboxylase   |
| IDI         | ETS05484               | isopentenyl-diphosphate delta-isomerase  |
| GGPPS       | ETR98769               | geranylgeranyl pyrophosphate synthetase  |
| FDFT        | ETS00586               | farnesyl-diphosphate farnesyltransferase |
| SQLE        | ETS03457               | squalene epoxidase                       |

**Table S2** Primers used in the study

| Name        | Sequences (5'-3')                              | Usage                                                                                     |
|-------------|------------------------------------------------|-------------------------------------------------------------------------------------------|
| Pcbh1-F     | CTCGGTACCCGGGGATCCTCTAGAGACTGACCGGACGTGTTTTG   | Amplification of <i>cbh1</i> promoter from RutC30 genome DNA                              |
| Pcbh1-R     | GATGCGCAGTCCGCGGTTG                            |                                                                                           |
| TrAcOS-F    | CAACCGCGGACTGCGCATCATGGCCTGCAAGTACAGCAC        | Amplification of <i>TrAcOS</i> from synthetic gene                                        |
| TrAcOS-R    | ATGATGATGATGATGATGGACCTTCAGCAGCTCGAG           |                                                                                           |
| Tcbh1-F     | CATCATCATCATCATTAAAGCTCCGTGGCGAAAGCCTG         | Amplification of <i>cbh1</i> terminator including His-tag sequence from RutC30 genome DNA |
| Tcbh1-R     | ACACATTCCACAGAGATCTACTAATTTCCACTGTTGC          |                                                                                           |
| ura5-F      | AGATCTCTGTGGAATGTGTG                           | Amplification of <i>ura5</i> marker cassette from plasmid dDNA-lae1                       |
| ura5-R      | TGCCTGCAGGTCGACGATTCTAGACAGGGCTGGTGACGGAATTTTC |                                                                                           |
| cbh1-down-F | CTCGGTACCCGGGGATCCTCTAGACCAGTGCGGCGGTATTGG     | Amplification of 3' flanking region for HDR of <i>T.reesei cbh1</i>                       |
| cbh1-down-R | TGCCTGCAGGTCGACGATTCTCATTGCGCACTATAG           |                                                                                           |
| IDENcbh1-F  | ATGGTCATCAAACAAAGAAC                           | Verification of transformants                                                             |
| IDENcbh1-R  | GAAGATCAATGCTGTGCAAG                           |                                                                                           |
| hyp3-F      | CAACCGCGGACTGCGCATCATGCGCCCCATCACCTGCAG        | Amplification of <i>hyp3</i> from synthetic gene                                          |
| hyp3-R      | AATGATGATGATGATGATGGATGCCGCGGAGGCCGGGCT        |                                                                                           |
| ari-F       | CAACCGCGGACTGCGCATCATGAAGAAGCCCAACGGCAC        | Amplification of <i>ari</i> from synthetic gene                                           |

|              |                                                             |                                                            |
|--------------|-------------------------------------------------------------|------------------------------------------------------------|
| ari-R        | TAATGATGATGATGATGATGGTCGACGACGACGCTGTAG                     |                                                            |
| PaFS-F       | CAACCGCGGACTGCGCATCATGGAGTTCAAGTACAGC                       |                                                            |
| PaFS-R       | TTAATGATGATGATGATGATGGACGCGGAGCAGCTCGAG                     | Amplification of <i>PaFs</i> from synthetic gene           |
| EvSS-F       | CAACCGCGGACTGCGCATCATGGAGTACAAGTTCAGC                       |                                                            |
| EvSS-R       | TAATGATGATGATGATGATGGCCGGTCTTAAGCAGCTC                      | Amplification of <i>Evss</i> from synthetic gene           |
| HelA-F       | CAACCGCGGACTGCGCATCATGGCCACCGACAGCAGC                       |                                                            |
| HelA-R       | TAATGATGATGATGATGATGGATGGCGAGGCACTCGTTG                     | Amplification of <i>hela</i> from synthetic gene           |
| TAS-F        | CAACCGCGGACTGCGCATCATGAGCAGCAGCACCGGCAC                     |                                                            |
| TAS-R        | TAATGATGATGATGATGATGGACCTGGATGGGGTCAATG                     | Amplification of <i>TAS</i> from synthetic gene            |
| TAS-linker-R | CCCCCGCCAGAGCCGCCGCCGGAGCCACCACCTCCGACCTGGAT<br>GGGGTCAATG  | Amplification of <i>TAS</i> from synthetic gene            |
| PT-F         | GCGGCTCTGGCGGGGGGGCAGCGGCGGAGGAGGCTCGACCCAGCTCG<br>AGTGGATG | Amplification of GGPPS domain from <i>PaFS</i>             |
| LHA- Lae1-F  | CCGGGGATCCTCTAGAGATATATGAATGCTGTGCTCAG                      | Amplification of 5' flanking of <i>lae1</i> from <i>T.</i> |
| LHA- Lae1-R  | AATGTAGGATTCCGCTCTGCGGGTCAATCCTTGGAATG                      | <i>reesei</i> genome served as right homologous arm        |
| Ptcu1-F      | AGAGCGGAATCCTACATTC                                         |                                                            |
| Ptcu1-R      | GGAGAGGATTGGACAACATTGTCGTATCAACCAGGTC                       | Amplification of <i>tcu1</i> promoter                      |

|                     |                                                                |                                                                                                        |
|---------------------|----------------------------------------------------------------|--------------------------------------------------------------------------------------------------------|
| xyr1-F              | ATGTTGTCCAATCCTCTCC                                            | Amplification of <i>xyr1<sup>A824V</sup></i> gene                                                      |
| xyr1-R              | TCATCACCATCACCCTAAGCGATACCCATCATCAAC                           | Amplification of <i>xyr1<sup>A824V</sup></i> gene                                                      |
| Ttef1-F             | CCTCCATCATCACCATCACCCTAAGCGATACCCATCATCAACACCTGA<br>TGTTCTGGGG | Amplification of <i>tef1</i> terminator                                                                |
| Ttef1-R             | AGTGAGGGTTAATTGCGCCAACGATTCCTCTCACGTT                          |                                                                                                        |
| hyg-F               | GCGCAATTAACCCTCACT                                             | Amplification of hygromycin resistance cassette                                                        |
| hyg-R               | CAGGGCTGGTGACGGAATT                                            |                                                                                                        |
| RHA- <i>Lae1</i> -F | ATTCCGTCACCAGCCCTGGAAAATCATGGATCTCGGCA                         | Amplification of 3' flanking of <i>lae1</i> from <i>T. reesei</i> genome served as left homologous arm |
| RHA- <i>Lae1</i> -R | ATGCCTGCAGGTCGACGATCTGCGGTGGTAGCGATGC                          |                                                                                                        |
| PamyB-F             | TCGGTACCTCTAGAATTGTGCAAATGCCGTAAGC                             | Amplification of <i>amyB</i> promoter                                                                  |
| PamyB-R             | GATGATGATGGCTAGCAAATGCCTTCTGTGGGGTTTATTG                       |                                                                                                        |
| TamyB-F             | CATCATCATCATCATCATTAAGGGTGGAGAGTATATGATG                       | Amplification of <i>amyB</i> terminator including His-tag sequence                                     |
| TamyB-R             | TAGCCGGAGATTTGACCGAATC                                         |                                                                                                        |
| Ade-F               | TTCGGTCAAATCTCCGGCTACTCATGCCGTCATGTCCAG                        | Amplification of wild type <i>AoadeA</i> as the selectable marker                                      |
| Ade-R               | TCTGCGCAACAGCATAACGAG                                          |                                                                                                        |
| RHA-F               | TCGTATGCTGTTGCGCAGACGGCCAAGAACAGCACTAC                         | Amplification of the 3' flanking region for HDR of <i>AoamyB</i>                                       |
| RHA-R               | CTGCAGGTCGACGATCTCTAGACACGAGCTACTACAGATCTTG                    |                                                                                                        |

|                  |                                                                   |                                                         |
|------------------|-------------------------------------------------------------------|---------------------------------------------------------|
| AoAcOS-F         | AAACCCACAGAAGGCATTTATGGCCTGCAAGTACAGCACC                          | Amplification of <i>AoAcOS</i> gene from synthetic gene |
| AoAcOS-R         | TTAATGATGATGATGATGATGGACCTTCAGCAGCTCGAGCAT                        |                                                         |
| $\Delta$ amyB-FF | GGCAACAAGCATGGAGTC                                                | verification of NSAR1-AoAcOS transformants for HDR      |
| $\Delta$ amyB-FR | CTGCCATGTTCCACCACAG                                               |                                                         |
| $\Delta$ amyB-RF | CTCATGCCGTCATGTCCAG                                               | verification of NSAR1-AoAcOS transformants for HDR      |
| $\Delta$ amyB-RR | GCCATTCGTCAAGGTATAG                                               |                                                         |
| OF-DN-F          | CTGTTCGATTTCGATACTAACGCCGCCATCCAGTGTCGAGCCAGGCGCCTT<br>TATATCATAT | Construction of yeast strain BB-ScAcOS                  |
| OF-DN-R          | GACTATAATATTATGCATATAGGA                                          |                                                         |
| OF-GAL1-F        | TGAATCTTGTCTGTTTGGTAGCGGCTGCTTTATTTATATTGAATTTTCAA<br>AAATTCTTA   | Construction of yeast strain BB-ScAcOS                  |
| OF-GAL1-R        | GGAGTCGATCAAGGTGGAGTACTTACAGGCCATTATAGTTTTTTCTCCTT<br>GACGTAAA    |                                                         |
| OF-HYG-F         | AATGAATCTTTCTGTCTGCTTGAAAGATTTTCGGCTAGCTTGCCTCGTC<br>CCCGCCGGG    | Construction of yeast strain BB-ScAcOS                  |
| OF-HYG-R         | TTTTGTGTCTTAATTATATGATATAAAGGCGCCTGGCTCGACACTGGAT<br>GGCGGCGTTA   |                                                         |



---

|             |                                                                  |                                        |
|-------------|------------------------------------------------------------------|----------------------------------------|
| OF-RBL-F    | GGAGTTGTTGAAGGTCCACCACCATCACCACCACTGAGCGGATTGAGA<br>GCAAATCGTTA  |                                        |
| OF-RBL-R    | TCGCTGGCCGGGTGACCCGGCGGGGACGAGGCAAGCTAGCCGAAAATC<br>TTTCAAGCACG  | Construction of yeast strain BB-ScAcOS |
| OF-UP-F     | TTTGCCAACAATCGAAACCAAACA                                         |                                        |
| OF-UP-R     | TCCAAAAAAAAAAGTAAGAATTTTTGAAAATTCAATATAAATAAAGCAG<br>CCGCTACCAAA | Construction of yeast strain BB-ScAcOS |
| OF-yeAcOS-F | TACCTCTATACTTTAACGTCAAGGAGAAAAAACTATAATGGCCTGTAAG<br>TACTCCACCT  |                                        |
| OF-yeAcOS-R | TACTTGACCTGAACTTAACGATTTGCTCTCAATCCGCTCAGTGGTGGTG<br>ATGGTGGTGG  | Construction of yeast strain BB-ScAcOS |

---

**Table S3** Plasmids used in the study

| <b>Plasmids</b> | <b>Characteristics</b>                                                                                                                                                                    | <b>Source</b> |
|-----------------|-------------------------------------------------------------------------------------------------------------------------------------------------------------------------------------------|---------------|
| pMD18T-TrAcOS   | Plasmids containing Pcbh1-TrAcOS-Tcbh1 cassette and <i>ura5</i> marker gene cassette served as donor DNA to replace the <i>cbh1</i> gene, ( <i>Amp<sup>R</sup></i> )                      | This work     |
| pMD18T-AoAcOS   | Plasmids containing PamyB-AoAcOS-TamyB cassette and <i>adeA</i> marker cassette served as donor DNA to replace the <i>AoamyB</i> gene, ( <i>Amp<sup>R</sup></i> )                         | This work     |
| pMD18T-xyr1     | Plasmids containing Ptcu1-xyr1 <sup>A824V</sup> -Ttef1 cassette and <i>hph</i> marker gene cassette served as overexpressing <i>xyr1<sup>A824V</sup></i> gene, ( <i>Amp<sup>R</sup></i> ) | This work     |
| dDNA-lae1::xyr1 | Plasmids containing Ptcu1-xyr1 <sup>A824V</sup> -Ttef1 cassette and <i>hph</i> marker gene cassette served as donor DNA to replace the <i>lae1</i> gene, ( <i>Amp<sup>R</sup></i> )       | This work     |
| pMD18T-hyp3     | Plasmids containing Pcbh1-hyp3-Tcbh1 cassette and <i>ura5</i> marker gene cassette served as donor DNA to replace the <i>cbh1</i> gene, ( <i>Amp<sup>R</sup></i> )                        | This work     |
| pMD18T-ari      | Plasmids containing Pcbh1-ari-Tcbh1 cassette and <i>ura5</i> marker gene cassette served as donor DNA to replace the <i>cbh1</i> gene, ( <i>Amp<sup>R</sup></i> )                         | This work     |
| pMD18T-Pafs     | Plasmids containing Pcbh1-Pafs-Tcbh1 cassette and <i>ura5</i> marker gene cassette served as donor DNA to replace the <i>cbh1</i> gene, ( <i>Amp<sup>R</sup></i> )                        | This work     |
| pMD18T-Evss     | Plasmids containing Pcbh1-Evss-Tcbh1 cassette and <i>ura5</i> marker gene cassette served as donor DNA to replace the <i>cbh1</i> gene, ( <i>Amp<sup>R</sup></i> )                        | This work     |
| pMD18T-helA     | Plasmids containing Pcbh1-helA-Tcbh1 cassette and <i>ura5</i> marker gene cassette served as donor DNA to replace the <i>cbh1</i> gene, ( <i>Amp<sup>R</sup></i> )                        | This work     |
| pMD18T-TAS      | Plasmids containing Pcbh1-TAS-Tcbh1 cassette and <i>ura5</i> marker gene cassette served as donor DNA to replace the <i>cbh1</i> gene, ( <i>Amp<sup>R</sup></i> )                         | This work     |
| pMD18T-GPTAS    | Plasmids containing Pcbh1-GPTAS-Tcbh1 cassette and <i>ura5</i> marker gene cassette served as donor DNA to replace the <i>cbh1</i> gene, ( <i>Amp<sup>R</sup></i> )                       | This work     |

**Table S4** Strains used in the study

| <b>name</b>                                               | <b>genotype</b>                                                                                                                                        | <b>Source</b> |
|-----------------------------------------------------------|--------------------------------------------------------------------------------------------------------------------------------------------------------|---------------|
| MC3-TrAcOS                                                | <i>T. reesei</i> MC3, $\Delta cbh1::TrAcOS$                                                                                                            | This work     |
| NSAR1-AoAcOS                                              | <i>A. oryzae</i> NSAR1, $\Delta amyB::AoAcOS$                                                                                                          | This work     |
| BB-ScAcOS                                                 | <i>S. cerevisiae</i> BB, <i>ScAcOS</i>                                                                                                                 | This work     |
| MC3- $\Delta$ 10                                          | <i>T. reesei</i> MC3, $\Delta cbh2\Delta xyn2\Delta egl1\Delta egl2\Delta egl3\Delta bxl1\Delta egl4$<br>$\Delta cip1\Delta cel74a\Delta bgl1, ura5^-$ | This work     |
| MC3- $\Delta$ 10-TrAcOS                                   | <i>T. reesei</i> MC3- $\Delta$ 10, $\Delta cbh1::TrAcOS$                                                                                               | This work     |
| OExyr1/MC3- $\Delta$ 10                                   | <i>T. reesei</i> MC3- $\Delta$ 10, <i>xry1</i> <sup>A824V</sup>                                                                                        | This work     |
| $\Delta lae1::xyr1$ /MC3- $\Delta$ 10<br>(ROBUST chassis) | <i>T. reesei</i> MC3- $\Delta$ 10, $\Delta lae1::xry1$ <sup>A824V</sup>                                                                                | This work     |
| OExyr1/MC3- $\Delta$ 10-TrAcOS                            | <i>T. reesei</i> OExyr1/MC3- $\Delta$ 10, $\Delta cbh1::TrAcOS$                                                                                        | This work     |
| $\Delta lae1::xyr1$ /MC3- $\Delta$ 10-TrAcOS              | <i>T. reesei</i> $\Delta lae1::xyr1$ /MC3- $\Delta$ 10, $\Delta cbh1::TrAcOS$                                                                          | This work     |
| ROBUST-HYP3                                               | <i>T. reesei</i> $\Delta lae1::xyr1$ /MC3- $\Delta$ 10, $\Delta cbh1::hyp3$                                                                            | This work     |
| ROBUST-ARI                                                | <i>T. reesei</i> $\Delta lae1::xyr1$ /MC3- $\Delta$ 10, $\Delta cbh1::ari$                                                                             | This work     |
| ROBUST-PaFS                                               | <i>T. reesei</i> $\Delta lae1::xyr1$ /MC3- $\Delta$ 10, $\Delta cbh1::Pafs$                                                                            | This work     |
| ROBUST-EvSS                                               | <i>T. reesei</i> $\Delta lae1::xyr1$ /MC3- $\Delta$ 10, $\Delta cbh1::Evss$                                                                            | This work     |
| ROBUST-HelA                                               | <i>T. reesei</i> $\Delta lae1::xyr1$ /MC3- $\Delta$ 10, $\Delta cbh1::helA$                                                                            | This work     |
| MC3- $\Delta$ 10-TAS                                      | <i>T. reesei</i> MC3- $\Delta$ 10, $\Delta cbh1::TAS$                                                                                                  | This work     |
| MC3- $\Delta$ 10-GPTAS                                    | <i>T. reesei</i> MC3- $\Delta$ 10, $\Delta cbh1::GPTAS$                                                                                                | This work     |
| ROBUST-GPTAS                                              | <i>T. reesei</i> $\Delta lae1::xyr1$ /MC3- $\Delta$ 10, $\Delta cbh1::GPTAS$                                                                           | This work     |
